# Supplementary material for: Cyanovirin-N Binds Viral Envelope Proteins at the Low-Affinity Carbohydrate Binding Site without Direct Virus Neutralization Ability
Source: MDPI journal article supplement (doi:10.3390/molecules26123621), 2021-06-13
Supplement: s1 [file s1]

*Supplementary Material*

# **Cyanovirin-N Binds Viral Envelope Proteins at the Low-Affinity Carbohydrate Binding Site without Direct Virus Neutralization Ability**

**Irene Maier <sup>1,\*</sup>, Robert H. Schiestl <sup>1</sup> and Georg Kontaxis <sup>2</sup>**

<sup>1</sup> Department of Environmental Health Sciences, Fielding School of Public Health, University of California, Los Angeles, CA 90095, USA; RSchiestl@mednet.ucla.edu

<sup>2</sup> Max Perutz Laboratories, Department of Structural and Computational Biology, University of Vienna, A-1030 Vienna, Austria; georg.kontaxis@univie.ac.at

\* Correspondence: irene.maier@meduniwien.ac.at; Tel.: +1-310-267-2087; Fax: +1-310-267-2578

## A) CV-N (monomeric)

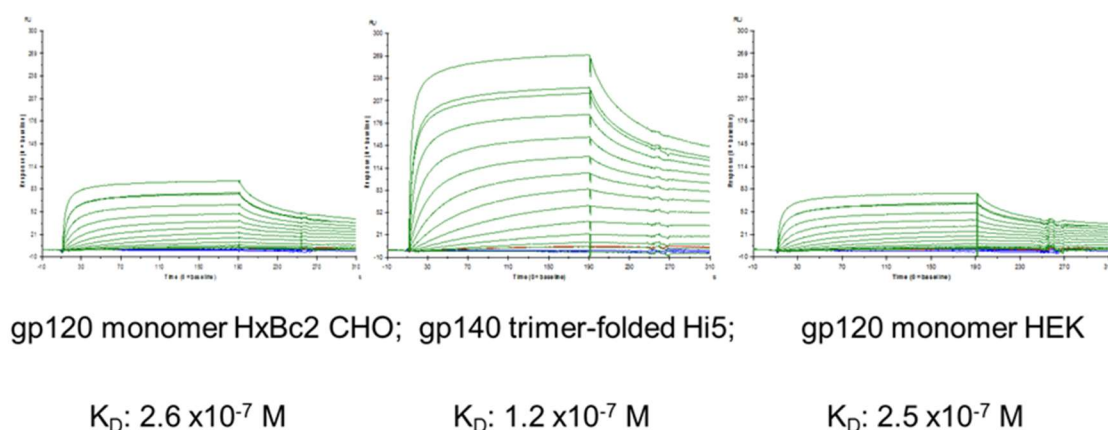

## B) CVN2L0-B (left) and CVN2L0-N (right) binding to gp120 (HxBc2, CHO)

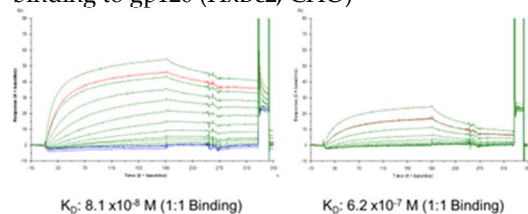

## C) CVN2L0-B (left) and CVN2L0-N (right) binding to gp140 (Hi5)

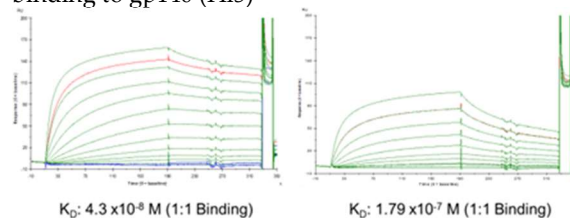

## D) CVN-E binding to gp120 and gp140

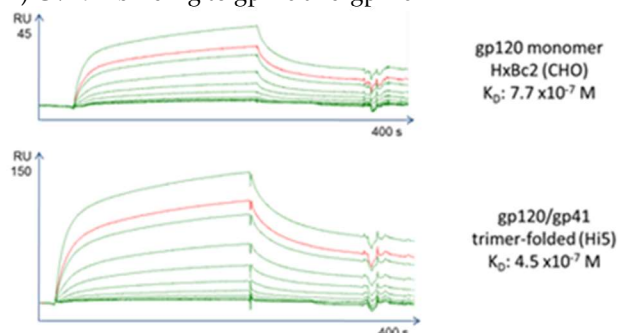

## E) CVN2L0-P binding to gp120 and gp140

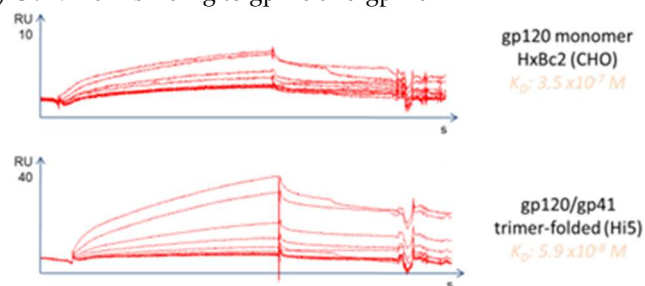

**Figure S1.** Surface Plasmon Resonance (A) CV-N binding curves are shown for binding to HIV-1 envelope S glycoproteins gp120 expressed in mammalian CHO or HEK293 cells, and the gp140 trimer-folded spike. (B) Sensorgrams from analyses in which binding site knockout mutants CVN2L0-B (2 high-affinity binding sites-H and 1 low-affinity binding site-L) and CVN2L0-N (2 L) were injected over immobilized gp120. Concentrations of analytes ranged from 5120 nM (2560, 1280, 640, 320, 160, 80, 40, 20, 10, 5) to 2.5 nM. (C) Sensorgrams showing CVN2L0-B and CVN2L0-N binding to gp140 at the same analyte concentrations. (B) and (C)  $K_D$ s for CVN and mutants (Table 1) are calculated according to the 1:1 binding model showing exact fits for both, the association phase = 190 sec; and the dissociation phase = 120 sec. (D) Sensorgrams for CVN-E binding to gp120 and gp140 (green). (E) Sensorgrams for CVN2L0-P binding to gp120 and gp140 (red). Analysis was as in B.

### Surface Plasmon Resonance (SPR)

The SPR binding assays compared binding affinities of CV-N (2 disulfide bonds) and engineered dimeric binding site mutants (4 disulfide bonds) to gp120, gp140, HA, and Ebola GP1,2 using BIAcore T100 (see Materials and Methods).

Disulfide bond variant CVN2L0-V2 (3 disulfide bonds) was tested for binding affinities to HA by SPR on Reichert's SR7500DC (Buffalo, NY, USA, Figure S2B). Kinetic studies were performed on the two-channels SPR instrument using various analyte concentrations in the range of  $10^{-5}$ – $10^{-8}$  M, with a regeneration step after each injection and blank measurements after different analytes. CMD500D SPR sensorchips were purchased from Xantec bioanalytics (Düsseldorf, Germany). Running buffer (HBS-EP (+)) contained 10 mM HEPES, 150 mM NaCl, 3 mM EDTA and 0.05% Tween at pH 7.4. Measurements were performed at 25 °C at a flow rate of 30  $\mu$ L/min. All solutions were degassed and filtered (0.2  $\mu$ m) before injection into the system. Sensorchips were activated using single-channel amine coupling, where 0.4 M EDC/HCl and 0.1 M NHS were used to activate the carboxymethyl dextran hydrogel chip surface. The ligand (HA) was diluted to 20  $\mu$ g/mL in 10 mM sodium acetate buffer (pH 5) and then injected onto the activated chip surface. The recombinant influenza A virus hemagglutinin H3 protein (H3N2 A/Wisconsin/67/05) was obtained from abcam (Cambridge, UK). The second channel, not coated with the ligand, served as a reference channel.

**A)**

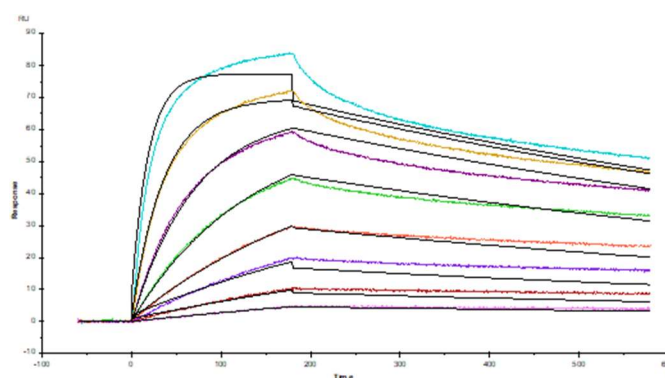

**CV-N**

$$K_D: 5.7 \times 10^{-9} \text{ M}$$

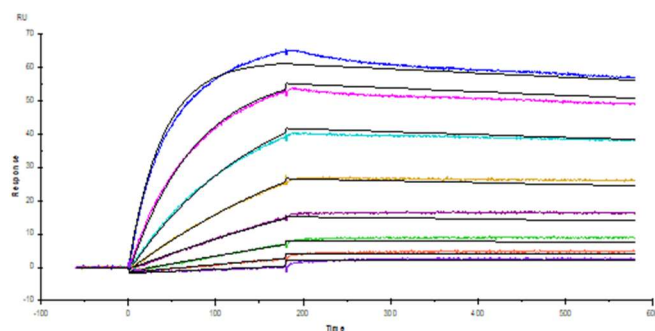

**CVN2L0-B**

$$K_D: 2.7 \times 10^{-9} \text{ M}$$

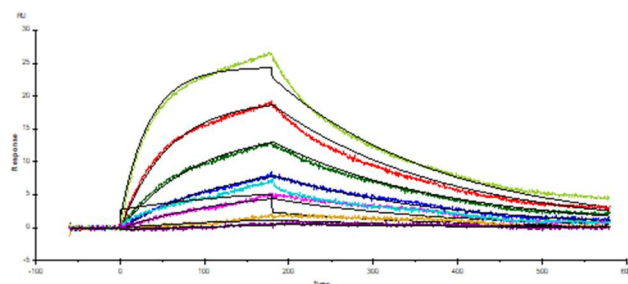

**CVN2L0-N**

$$K_D: 6.5 \times 10^{-8} \text{ M}$$

**B)**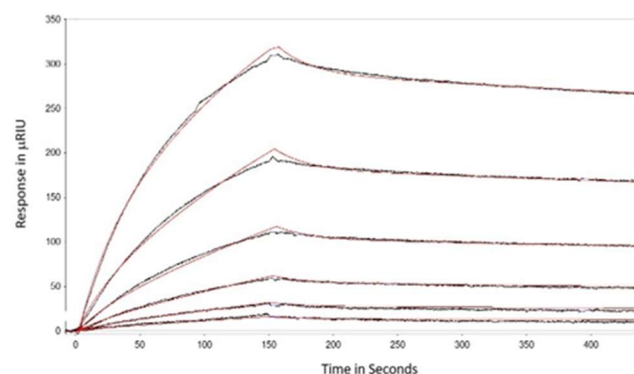**CVN2L0-V2** **$K_{D1}=49$  nM and** **$K_{D2}=8$   $\mu$ M**

**Figure S2.** Sensorgrams from conventional SPR experiments on BIAcore T100 and Reichert SR7500DC instrument. **(A)** CV-N, CVN2L0-B and CVN2L0-N binding to HA full length protein (A/New-York/55/04). Concentrations of analytes ranged from 5120 nM (2560, 1280, 640, 320, 160, 80, 40, 20, 10, 5) to 2.5 nM. **(B)** CVN2L0-V2 interactions with H3N2 A/Wisconsin/67/05 involving 1 high-affinity and 2 low-affinity binding sites (Schilling, P.E. et al., 2020). Concentrations of the CV-N variant ranged from 1  $\mu$ M to 31.2 nM. The data were fit to a conformational change model in ClampTM with a  $K_{D1}$  of 49 nM and a  $K_{D2}$  of 8  $\mu$ M.

**A)**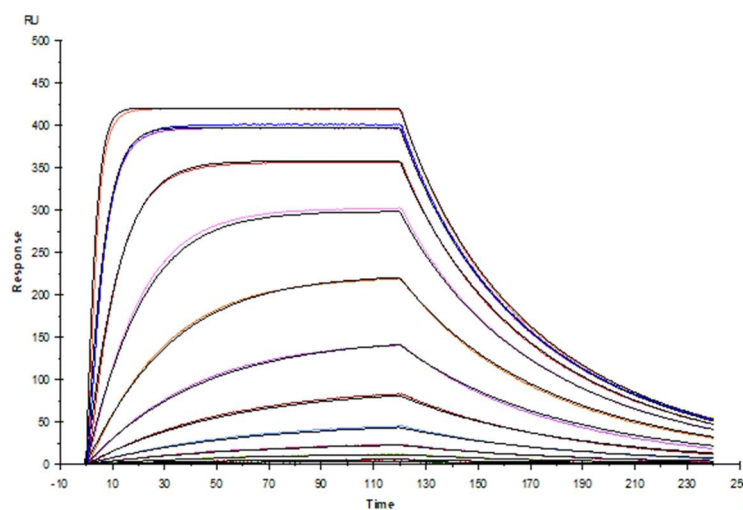

$$K_D = 6.4 \times 10^{-8} \text{ M}; R_{\text{max (calculated)}} \approx 447.1 \text{ RU}$$

**B)**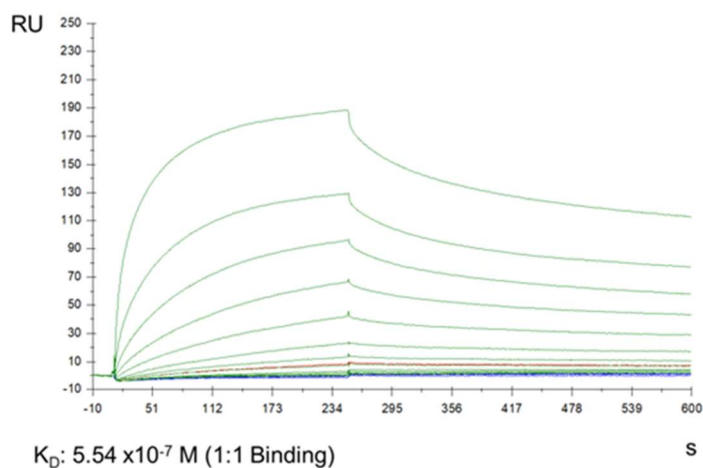

$$K_D: 5.54 \times 10^{-7} \text{ M (1:1 Binding)}$$

**Figure S3.** Surface Plasmon Resonance (A) Sensorgram from the binding analysis of HA H3 top (Fleury, D. et al., 1998) to HC19 Fab, which was captured by protein A on a pre-immobilized sensor S chip. (B) CV-N interaction with HA H3 top was verified on BIAcore T100.

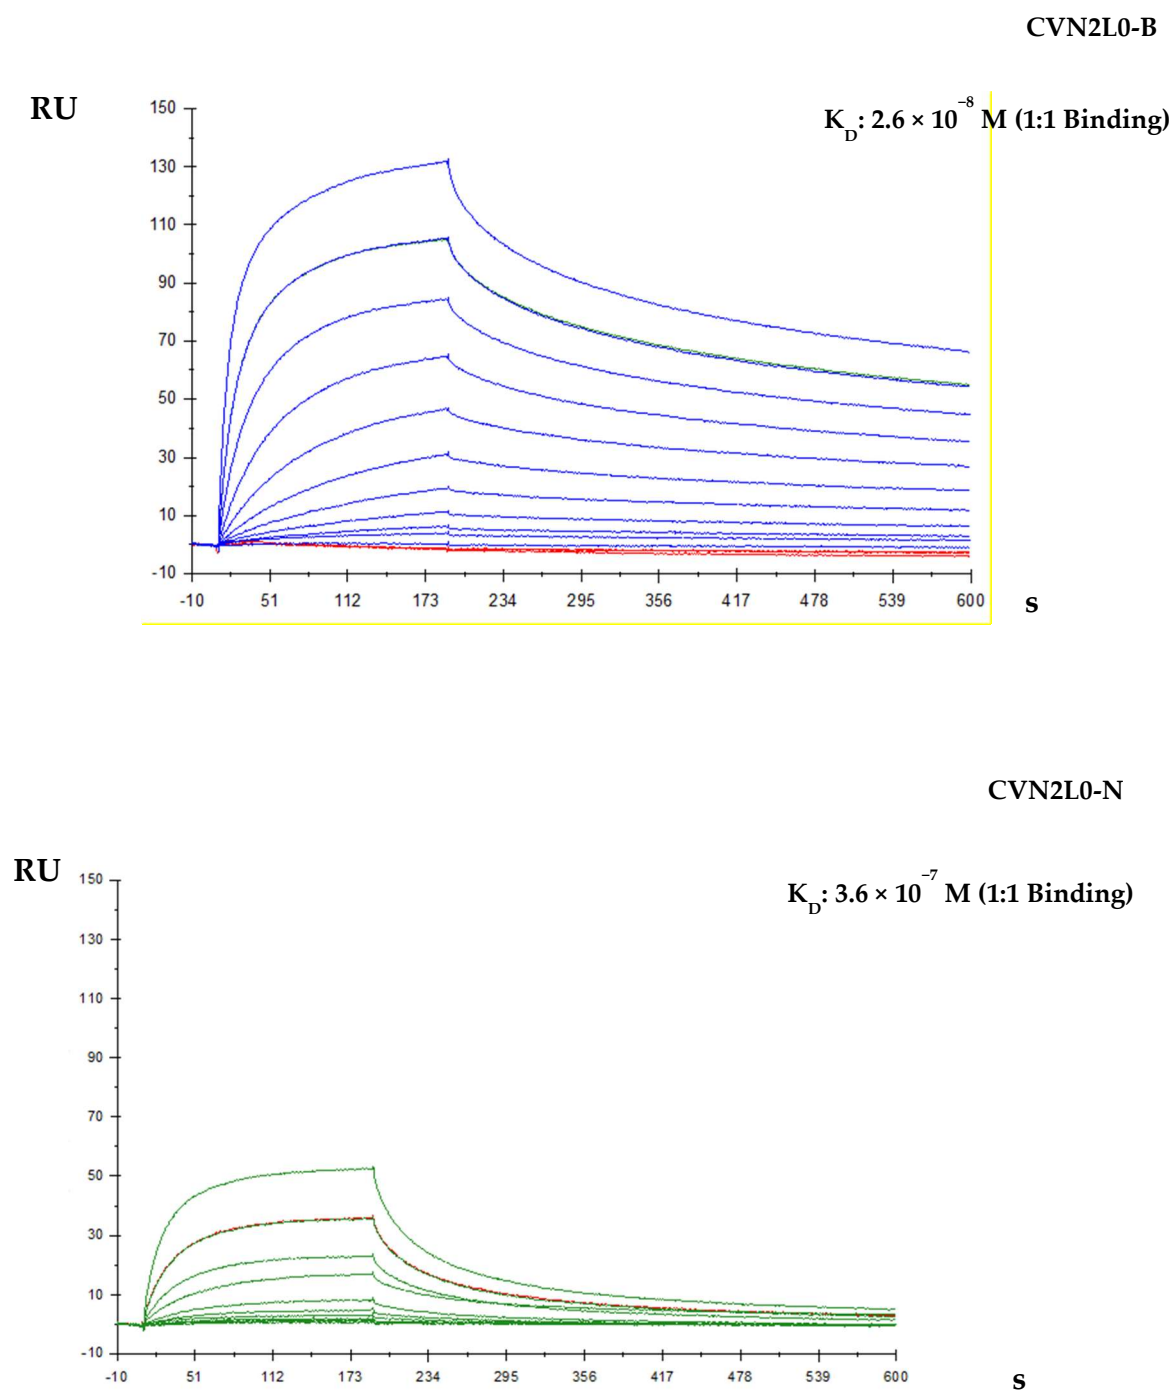

**Figure S4.** CVN2L0-B and CVN2L0-N binding curves are shown for Ebola GP1,2 which was immobilized onto CM5 sensorchips. Concentrations of analytes were 1280, 640, 320, 160, 80, 40, 20, 10, 5 and 2.5 nM (see above).

## CVN2—No. of functional binding sites.

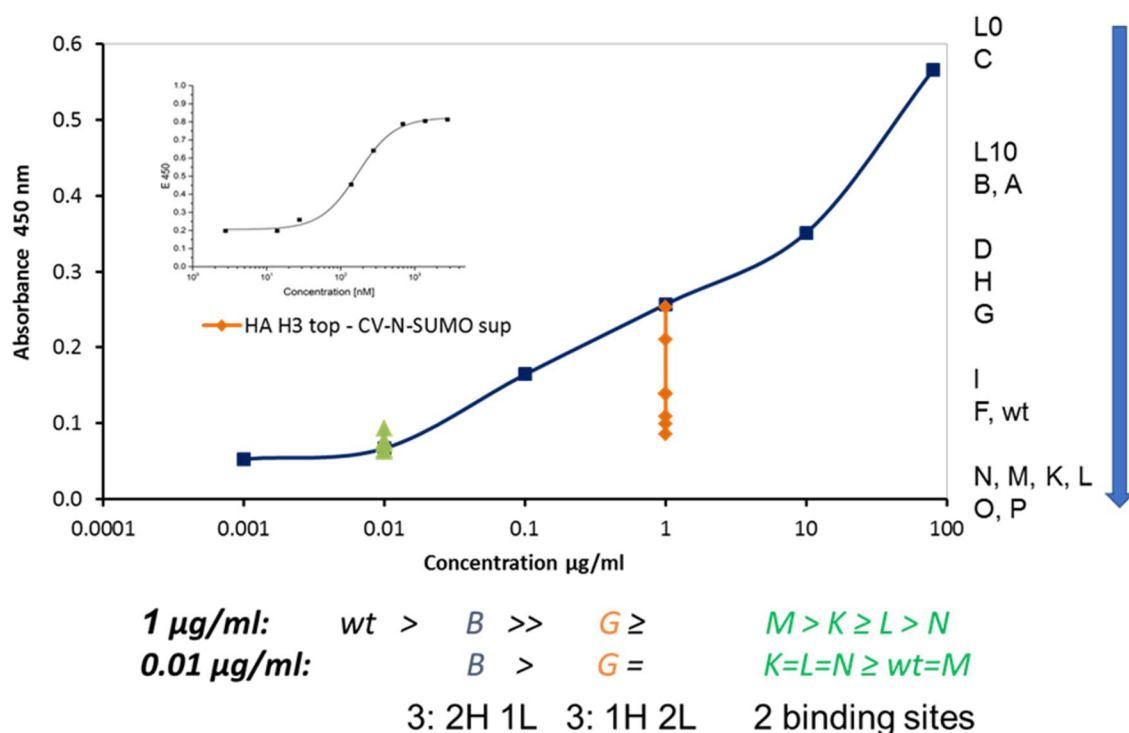

**Figure S5.** Calibration curve for ELISA testing CV-N affinities.

Binding to HA top was determined to be  $K_D = 4.17 \times 10^{-8}$  M (CVN2L0),  $K_D = 5.54 \times 10^{-7}$  M (WT CV-N), and  $K_D = 1.25 \times 10^{-8}$  M (HC19 Fab).

### Enzyme-Linked Immunosorbent Assay (ELISA)

The binding of engineered dimer CVN2L0 to hemagglutinin HA H3 was verified by applying ELISA in microtitration plate format. Briefly, CVN2L0 (without a linker between the two tandem-repeats of co-expressed CV-N monomers) was subcloned into pE-SUMO expression vector (T7, Amp) for *E. coli* (Life Sensors, Inc., US), including a His-tag for protein purification from the insoluble fraction, or supernatant. Additives were 10 mM MgCl<sub>2</sub>, 1 mM MgSO<sub>4</sub> and glucose. The sequence encoding the same protein was cloned into pET27b(+) and re-analyzed by LC-ESI-MS/MS. Nunc Maxisorp microtitration plates were coated with HA H3 100–0.1 µg/mL, blocked with 1% bovine serum albumin, washed 3 times with PBS-Tween, and subsequently incubated with SUMO-CVN2L0 fusion protein. Anti-SUMO primary antibody (1:1,000) and secondary anti-Chicken IgY antibody conjugated with horseradish peroxidase (1:5,000) were used for read out. Washing steps (3–5 times) were applied after each incubation step.

### Endpoint assay

The CV-N dimer with a linker of 10 residues between 2 repeats forming the domain-swapped CVN2 molecules (CVN2L10 with 2 high-affinity and 2 low-affinity carbohydrate binding sites) and binding site knockout mutants were created as described by Keeffe, J.R. et al. (2011), and were titrated against the HA full-length protein at 1 and 0.01 µg/mL. The mutants were the following: CVN2L0, -L10, CVN2L0-A, C, D, F, H, I, which had 4 functional carbohydrate binding sites; 2 high-affinity (H) sites and 2 low-affinity (L) sites. CVN2L0-B and G had 3 functional binding sites. WT CVN and CVN2L0-M, N, L, K had 2, and CVN2L0-O, P had 1.



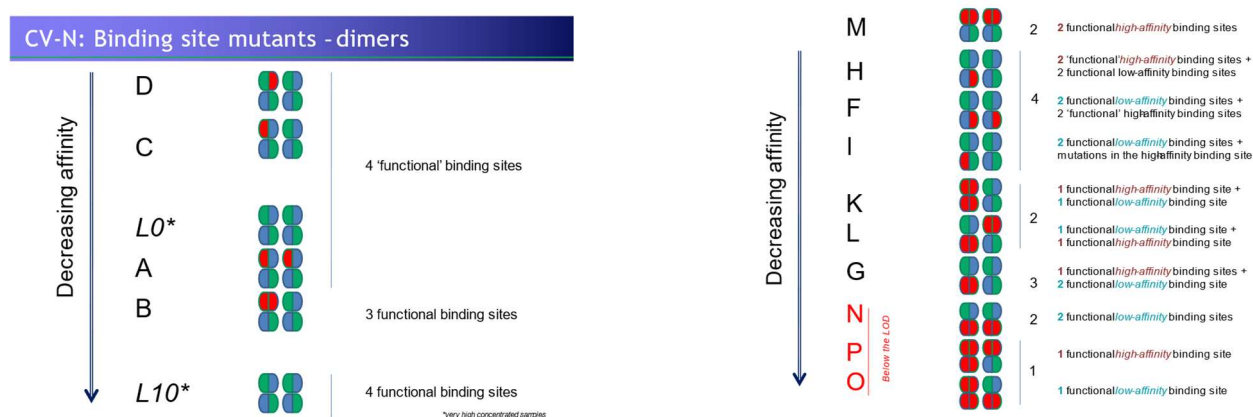

Half of the domains filled in red mark a mutated domain that resulted in binding-site knockouts and mutations in both domains of a single binding site in one or the other monomer.

| Mutations                  | 1st tandem-repeat CV-N sequence  | 2nd tandem-repeat CV-N sequence        |
|----------------------------|----------------------------------|----------------------------------------|
| CVN2L0 $\Delta\Delta$ (-B) | K3N, T7A, E23I                   | N93A                                   |
| CVN2L0 $\Delta$ BB (-N)    | E41A, N42A, T57A, R76A, Q78G     | E41A, N42A, T57A, R76A, Q78G           |
| CVN2L0 $\Delta$ AAB (-P)   | K3N, T7A, E23I, E41A, N42A, N93A | K3N, T7A, E23I, T57A, R76A, Q79G, N93A |
| CVN $\Delta\Delta$ (-E)    | K3N, T7A, E23I, N93A             |                                        |

## References

- Schilling, P. E., Kontaxis, G., Dragosits, M., Schiestl, R. H., Becker, C. F. W., and Maier, I. (2020) Mannosylated hemagglutinin peptides bind cyanovirin-N independent of disulfide-bonds in complementary binding sites. *RSC Adv* **10**, 11079–11087.
- Fleury, D., Wharton, S. A., Skehel, J. J., Knossow, M., and Bizebard, T. (1998) Antigen distortion allows influenza virus to escape neutralization. *Nat Struct Biol* **5**, 119–123.
- Keeffe, J. R., Gnanaprasam, P. N., Gillespie, S. K., Yong, J., Bjorkman, P. J., and Mayo, S. L. (2011) Designed oligomers of cyanovirin-N show enhanced HIV neutralization. *Proc Natl Acad Sci USA* **108**, 14079–14084.
